# Supplementary material for: Influence of anchoring group numbers in an efficient pyridine-anchor co-adsorbent of pyridinecarboxaldimine substituted aminonaphthalene on the performance of N719 sensitized solar cells
Source: Royal Society of Chemistry journal article supplement (doi:10.1039/c6ra06017j), 2016-01-01
Supplement: c6ra06017j1.pdf [file c6ra06017j1.pdf]

## Supporting Information

### **Influence of anchoring group numbers in an efficient pyridine-anchor co-adsorbent of pyridinecarboxaldimine substituted aminonaphthalene on the performance of N719 sensitized solar cells**

**Yuwei Dong,<sup>a</sup> Ligu Wei,<sup>b</sup> Ruiqing Fan,<sup>\*a</sup> Yulin Yang,<sup>\*a</sup> and Ping Wang<sup>a</sup>**

<sup>a</sup> *Department of Chemistry, Harbin Institute of Technology, Harbin 150001, P. R. China.*

<sup>b</sup> *College of Environmental and Chemical Engineering, Heilongjiang University of Science and Technology, Harbin 150022, P. R. China.*

\*Corresponding author: Tel: +86-451-86418270; Fax: +86-451-86418270

E-mail: [fanruiqing@hit.edu.cn](mailto:fanruiqing@hit.edu.cn) and [ylyang@hit.edu.cn](mailto:ylyang@hit.edu.cn)

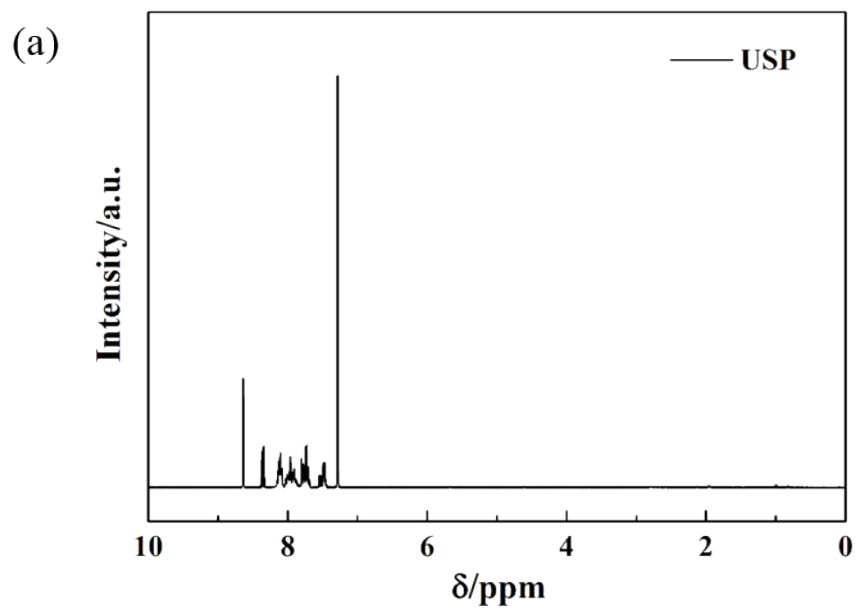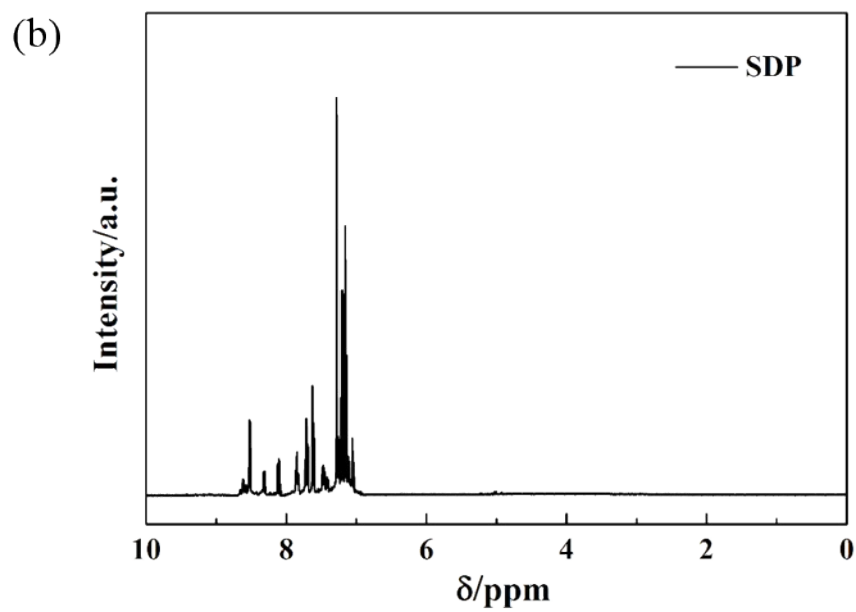

Fig. S1.  $^1\text{H}$  NMR spectra of (a) USP and (b) SDP in  $\text{CDCl}_3$ .

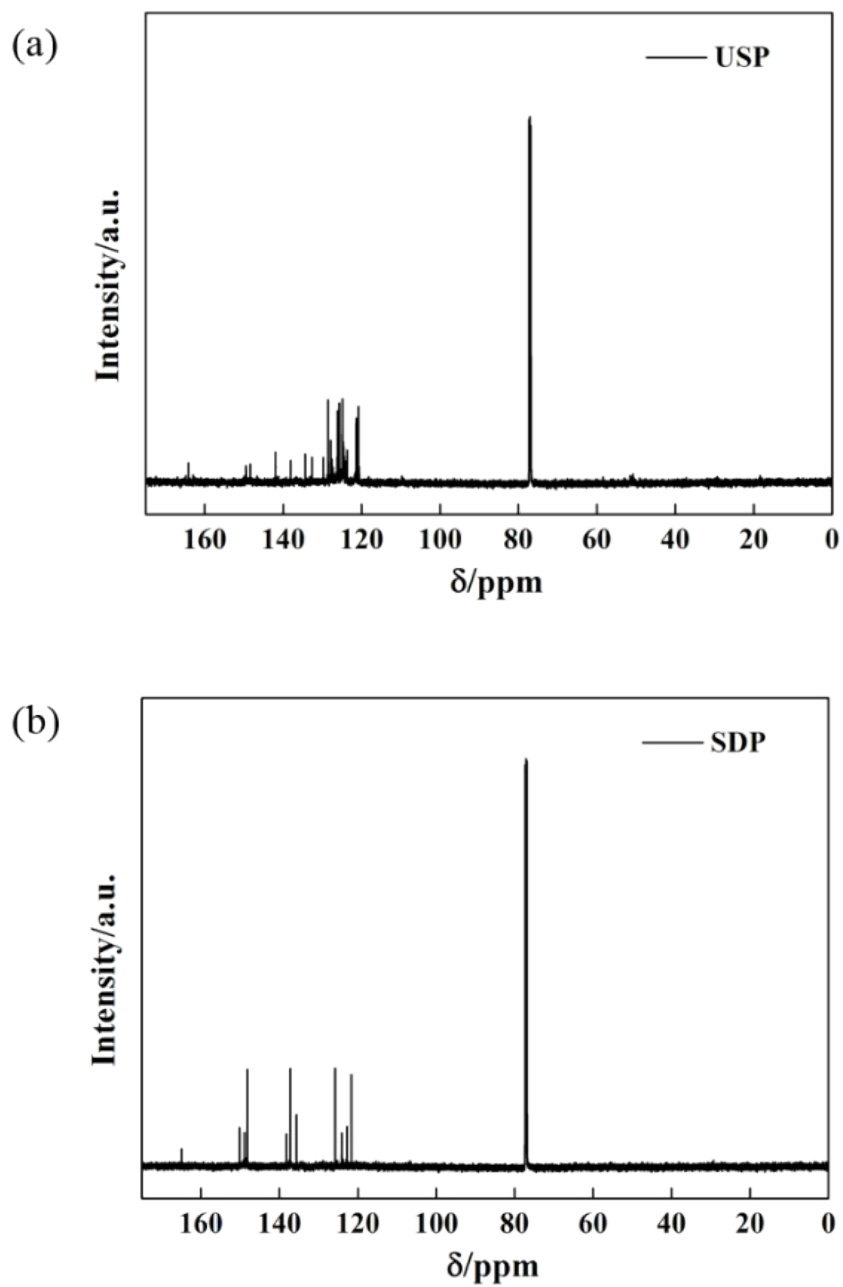

Fig. S2.  $^{13}\text{C}$  NMR spectra of (a) USP and (b) SDP in  $\text{CDCl}_3$ .

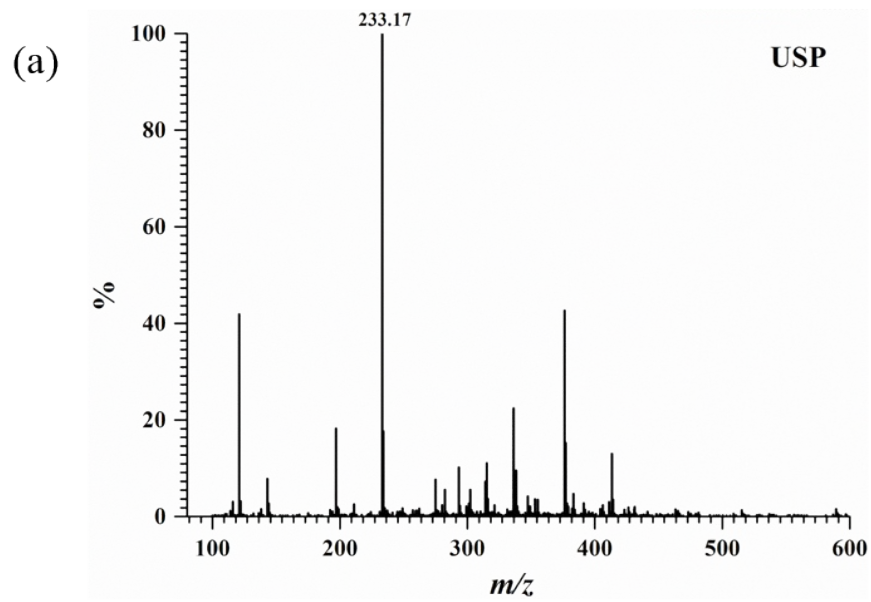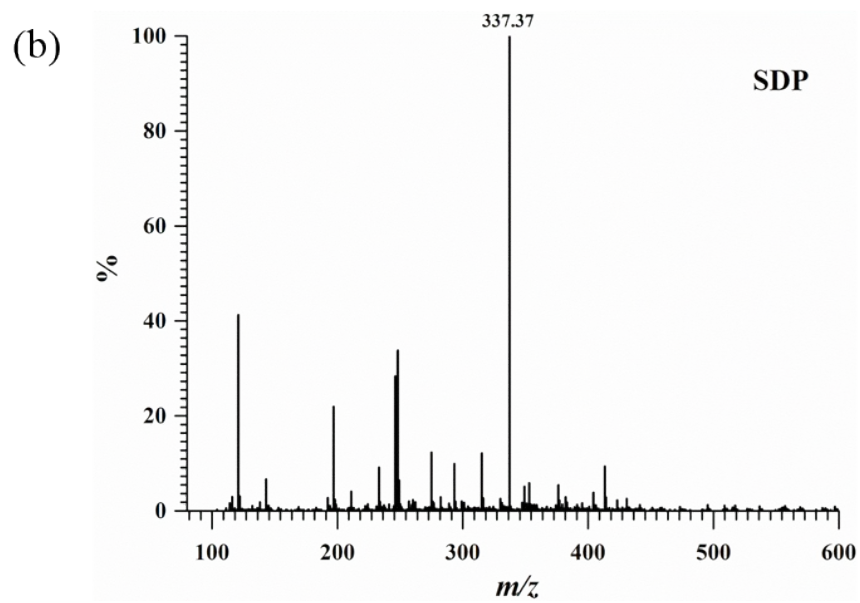

**Fig. S3.** ESI-MS spectra of (a) USP and (b) SDP.
